# Supplementary material
Source: HighWire-hosted journal article supplement (https://openres.ersjournals.com/content/7/1/00646-2020)

**Supplementary Figure 1**

Picture of positioning of pleural catheters during surgery and corresponding post-operative CT-scan in one patient.


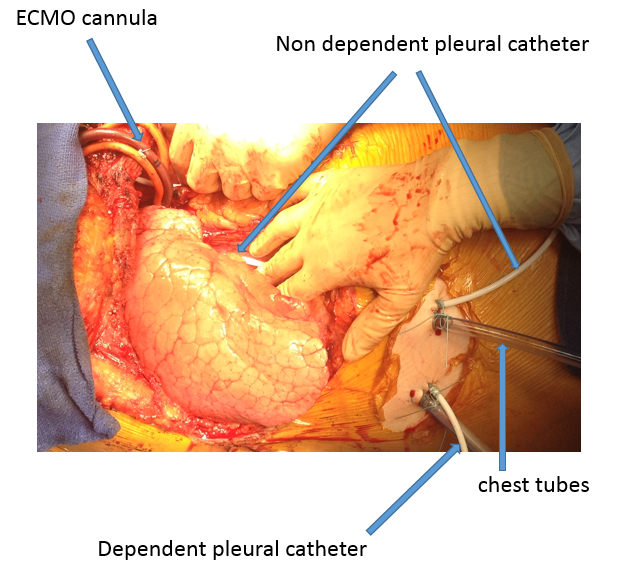


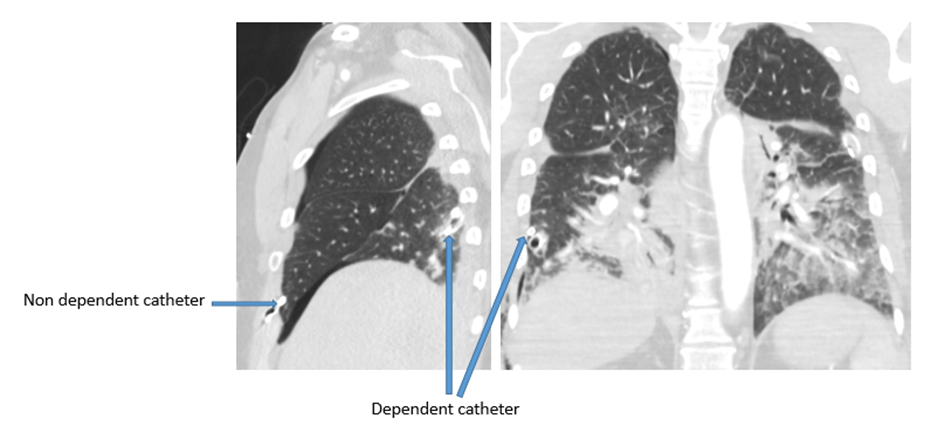

Supplement: inline-supplementary-material-3 [file inline-supplementary-material-3.docx]
